# 1 **Sex-specific responses to cold in a very cold-tolerant,** 2 **northern *Drosophila* species**

3  
4 Darren J. Parker<sup>1,2\*</sup>, Tapio Envall<sup>3</sup>, Michael G. Ritchie<sup>4</sup>, and Maaria Kankare<sup>3</sup>

5  
6 1. Department of Ecology and Evolution, University of Lausanne, Lausanne, Switzerland

7 2. Swiss Institute of Bioinformatics, Lausanne, Switzerland

8 3. Department of Biological and Environmental Science, University of Jyväskylä, Jyväskylä, Finland

9 4. Center for Biological Diversity, School of Biology, University of St. Andrews, Fife, Scotland, UK.

10

11 \* DarrenJames.Parker@unil.ch

12

## 13 **Abstract**

14

15 Organisms can plastically alter resource allocation in response to changing environmental  
16 factors. For example, in harsh conditions organisms are expected to shift investment from  
17 reproduction towards survival, however, the factors and mechanisms that govern the  
18 magnitude of such shifts are relatively poorly studied. Here we compared the impact of cold  
19 on males and females of the highly cold-tolerant species *Drosophila montana* at the  
20 phenotypic and transcriptomic levels. Although both sexes showed similar changes in cold  
21 tolerance and gene expression in response to cold treatment, indicating that the majority of  
22 changes are concordant between the sexes, we identified a clear reduction in sexually  
23 dimorphic gene expression, suggesting that preparing for colder season also involves  
24 reducing investment in sex-specific traits. This reduction was larger in males than females, as  
25 expected if male sexual traits are more condition-dependent than female traits, as predicted  
26 by theory. Gene expression changes were primarily associated with shifts in metabolic profile  
27 which likely play a role in increasing cold tolerance. Finally, we found that the expression of  
28 immune genes was reduced following cold treatment, suggesting that reduced investment in  
29 immunity may be important in helping flies survive colder periods.

30

31 **Keywords:** *Drosophila montana*, Cold tolerance, resource allocation, sex-specificity

## 32 Introduction

33

34 Life history strategies involve strategic allocation of investment between reproduction and  
35 survival, and relative investment in these depends on a wide range of intrinsic and extrinsic  
36 factors [1–3]. Many of these factors vary throughout an organism's lifetime meaning selection  
37 will favour different allocations at different times. As a result, organisms are typically able to  
38 plastically shift the relative allocation of resources in response to environmental cues,  
39 particularly when changes in the environment are predictable [4,5].

40

41 One predictable shift is the change from summer to winter when temperature is decreasing  
42 and day length is shortening. For organisms at high latitudes, this harshening of the  
43 environment is expected to produce a shift in resource allocation with a greater investment  
44 into survival over reproduction. This is because, in order to survive the colder conditions,  
45 organisms need to produce a range of costly metabolites and proteins and to begin to store  
46 resources to survive the colder season [6,7]. Numerous factors are likely to influence the  
47 magnitude of these trade-offs including life cycle, age, and condition. One potentially important  
48 factor, which is however surprisingly rarely studied, is that of sex. With the changing of the  
49 seasons both males and females have to adjust to the same conditions, so we may expect  
50 that the physiological shifts to survive colder temperatures may be similar. However, the  
51 relative costs of coping with lower temperatures may differ between the sexes. For instance,  
52 males may be more susceptible to cold than females (e.g. in *D. melanogaster* [8]) meaning  
53 that a greater shift in resources would be required in order for males to survive colder periods.  
54 In addition, although sexual traits in both sexes are expected to be reduced in response to  
55 worsening conditions [9–12], it is also expected that condition-dependence will be stronger for  
56 males than females due to sexual selection [13,14], meaning we should expect a larger shift  
57 in resources in males than in females when they prepare for the onset of cold. Finally, males  
58 and females typically have very different expression profiles, expressing a large fraction of  
59 genes at different levels throughout the genome to produce sexually dimorphic phenotypes  
60 [15,16]. Such differences in expression could restrict additional changes in gene expression  
61 (for instance if increased expression would have negative effects in one sex but not the other  
62 [17] or if a gene is already maximally expressed in one sex but not the other) and thus produce  
63 differences in how each sex can respond to cold.

64

65 Here we have three objectives. Firstly, we examine if males and females have similar  
66 phenotypic responses to the onset of cold in a cold-adapted species, *Drosophila (D.) montana*.  
67 This species is particularly well adapted to cold environments [18,19] with both sexes able to  
68 overwinter as adults at high latitudes and altitudes meaning that being able to survive cold-  
69 stress is an important part of their life history. Secondly, we examine if males and females  
70 have similar changes in gene expression when subjected to cold using an RNA-seq approach.  
71 This approach is ideal for examining how shifts in resource allocation occur since these  
72 changes are plastic and thus differences in gene expression will reflect differences in resource  
73 allocation strategies. We predict that i) males and females will show similar phenotypic  
74 changes to cold, ii) both sexes will show similar changes in gene expression for most genes,  
75 iii) genes associated with producing sexual differences in traits (i.e. sex-biased genes) will  
76 show significant reductions in expression in response to cold and, iv) this reduction will be  
77 larger in males than in females. Finally, we examine the functional processes associated with

78 genes that change expression to gain insight into the molecular mechanisms by which males  
79 and females cope with the onset of cold.

## 80 Results

81

### 82 ***Males and females show a similar phenotypic response to cold***

83

84 To assess if males and females have a similar response to cold we experimentally reduced  
85 the temperature flies were maintained at from 19 °C to 6 °C, representing average daytime  
86 temperatures in Central Finland in late July and early October respectively  
87 ([www.worlddata.info](http://www.worlddata.info)). After 5 days we compared the critical thermal minimum (CT<sub>min</sub>, the  
88 temperature at which flies lose neuromuscular function) of cold treated flies to control flies  
89 (see methods for details). Both males and females showed a significant increase in cold  
90 tolerance i.e. a lower CT<sub>min</sub> following cold treatment (Fig. 1, Table 1). There was no significant  
91 treatment by sex interaction indicating that males and females have a similar phenotypic shift  
92 in cold tolerance (Table 1).

93

### 94 ***Males and females show similar changes in gene expression in response to cold***

95

96 Flies raised under the same conditions used for phenotypic measurements (above) were also  
97 used for gene expression analyses. Both sex and temperature strongly influenced gene  
98 expression (Fig. 2A) with samples clustering first by sex, then by temperature (Fig. 2B).  
99 Differential expression analyses found that a little over 10% of all expressed genes were DE  
100 in response to cold in both males (1236 / 9338) and females (1062 / 9338), with significant  
101 overlap between genes DE in males and females (Fig. 3). This overlap was much greater than  
102 expected by chance ( $p = 1.7 \times 10^{-110}$ ). Gene expression change in response to cold was also  
103 highly correlated between males and females for all genes ( $\rho = 0.59$ ,  $p$ -value  $< 2.2 \times 10^{-16}$ ,  
104 Fig. 4), and for genes DE in either males or females ( $\rho = 0.73$ ,  $p$ -value  $< 2.2 \times 10^{-16}$ ) with  
105 only a small number of genes (64) showing a significant sex by temperature interaction (Figs.  
106 3, S1).

107

### 108 ***Sexually dimorphic gene expression is reduced in response to cold***

109

110 To determine if exposure to cold alters the amount of sexually dimorphic gene expression we  
111 first examined how sex-biased genes change in response to cold. We found the amount of  
112 sexually dimorphic gene expression decreased in both males and females, with male-biased  
113 genes reducing in expression and female-biased genes increasing in expression in males,  
114 and female-biased genes decreasing in expression in response to cold in females (Fig. 5).  
115 Shifts in sex-biased genes were larger in males than females, for both male- and female-  
116 biased genes, leading to a more 'feminised' transcriptome overall (Fig. 6). Note, similar shifts  
117 in sex-biased gene expression were also found when using a more conservative set of sex-  
118 biased genes (genes that are sex-biased in both *D. montana* and its close relative *D. virilis*  
119 (Fig. S2; S3)), however, changes in expression in females were no longer significant. Next,  
120 we examined the correlation of gene expression for males and females for all genes in each  
121 temperature treatment. Correlations between male and female gene expression were  
122 significantly higher for flies kept at 19 °C than those at 6 °C (Fisher's z test,  $p = 0.0163$ ), though  
123 the magnitude of this difference was small (19 °C  $r = 0.686$ , 6 °C  $r = 0.704$ ).

124 ***Genes differentially expressed in response to cold are enriched for metabolism and***  
125 ***immune response in males and females***

126

127 We used functional annotation clustering to examine the function of genes DE in response to  
128 cold. Specifically, we used this approach to identify processes enriched for genes DE in both  
129 males and females, genes DE in males only, genes DE in females only, and genes showing  
130 a sex by treatment interaction (Supplemental Table 1). The largest number of enriched gene  
131 clusters were found from genes DE in both sexes. These were primarily connected to  
132 metabolism (e.g. lipid metabolism, fatty acid biosynthesis, carbohydrate kinases,  
133 metalloproteases, and aminotransferases) as well as to the immune response (e.g. innate  
134 immune response and DM9 repeat) suggesting these processes are important for both males  
135 and females to adjust to a colder environment. Interestingly, all genes in immune-related  
136 clusters showed decreased expression following cold treatment (Fig. S4), suggesting a  
137 reduced investment in immune function. Genes showing a significant sex by treatment  
138 interaction were enriched for transmembrane transport, suggesting that while changes to this  
139 process are important for both males and females in a colder environment, how it is mediated  
140 differs between the sexes (Fig. S5). Finally, we found that the functional clusters enriched in  
141 genes DE only in females or only in males were different. In females, clusters were related to  
142 oxidoreductase activity and the biosynthesis of amino acids, whereas in males, clusters were  
143 related to cytoplasmic translation, protein biosynthesis, transmembrane transport, ATP-  
144 binding domain, glutamine metabolic processes, and nucleotide-binding.

## 145 Discussion

146

147 In order to survive harsh conditions organisms are expected to shift investment towards  
148 survival and away from reproduction. This shift may differ between the sexes due to relative  
149 differences in the costs of reproduction or survival, or because of differences in regulatory  
150 architecture [15,16]. Despite its importance, the underlying mechanisms responsible for shifts  
151 in investment are poorly studied [20]. Here we examined such a shift by investigating the  
152 phenotypic and transcriptomic changes associated with the onset of cold in males and females  
153 of a cold tolerant fly species, *D. montana*.

154

155 We found that both sexes show a similar change in phenotype following cold treatment.  
156 Changes in cold tolerance (measured by CT<sub>min</sub>) might be expected to be similar as both  
157 males and females have similar baseline cold tolerances in benign temperatures [21] and  
158 because both sexes need to adjust their physiology in order to survive in colder temperatures.  
159 Although cold tolerances are similar between the sexes at benign temperatures, this need not  
160 be the case. For instance, in the more temperate, but closely related species, *D. virilis*, males  
161 show much lower cold tolerances than females at benign temperatures [21]. Why this is not  
162 the case in *D. montana* is unclear, but one possibility is that *D. montana*'s ability to survive  
163 extremely cold temperatures constrains cold tolerance at warmer temperatures in both sexes.

164

165 Changes in gene expression in response to cold were similar between the sexes, suggesting  
166 that males and females adjust their physiology using largely the same mechanisms.  
167 Unfortunately, very few studies have examined gene expression changes in males and  
168 females in response to stressful environmental conditions, however, our results agree with a  
169 previous study showing that most genes in male and female *D. melanogaster* are concordantly  
170 regulated in response to changes in dietary composition [23]. While we found that most gene  
171 expression differences were similar between the sexes, it is clear that there are also  
172 differences. We observed a reduction in sexually dimorphic gene expression, with males and  
173 females having more similar expression in the harsher, colder condition. This finding agrees  
174 with previous studies in *D. melanogaster* [24] and beetles [25–27] which showed a reduction  
175 of sexually dimorphic gene expression with reduced environmental quality. The shifts in sex-  
176 biased gene expression we observed were relatively small overall, but it is notable that the  
177 shifts were larger in males than females. This is likely because investment into sexual traits is  
178 more condition-dependent in males than females [13,14], suggesting that a reduction of  
179 investment into expensive male functions during winter represents a greater change in life  
180 history than female changes (see also [24,28]). Relatively few genes showed a significant sex  
181 by treatment interaction, reinforcing the idea that most changes in gene expression are  
182 concordant between the sexes. Interestingly however, these few genes were enriched for  
183 transmembrane transport, a process that has been previously associated with cold adaptation  
184 in a number of insects [29], including *D. montana* females [30]. Changes to transmembrane  
185 transport are thought to be particularly important for surviving cold temperatures by preventing  
186 a loss of cellular ionic balance [31–34]. Our results suggest that, despite its importance,  
187 changes to transmembrane transport are mediated by different genes in each of the sexes.  
188 The reasons for this are not clear, but it is possible that these differences may arise from sex-  
189 specific genetic constraints.

190

191 Overall, we found that the transcriptomic response to cold is extensive, with several hundred  
192 genes showing differential expression. By examining the functional processes associated with  
193 these gene expression changes we are able to gain insights into the mechanisms by which  
194 males and females cope with the onset of cold. We did this in two separate analyses, first  
195 examining processes enriched in genes DE in both sexes, then processes enriched in genes  
196 DE only in male or only in females. Processes enriched in both sexes included many that have  
197 been previously associated with increasing cold tolerance including metabolic shifts in lipids  
198 and carbohydrates. By altering their metabolic profile insects are able to maintain osmotic  
199 balance and stabilize the membrane structures of a cell as temperatures decrease (e.g. [35–  
200 38]. In particular, changes in lipids, fatty acids, and polyols have been shown to be important  
201 for cold adaptation in many insect taxa [6,7,39,40], including *D. montana* females [19,30,41].  
202 This is consistent with the changes we identify here, including DE of previously identified  
203 candidate genes *Inos* and *CG6910* [30,41]. Both of these genes belong to the inositol  
204 biosynthetic pathway, emphasizing the importance of this pathway for surviving colder  
205 temperatures in *D. montana*.

206  
207 Interestingly, we also found an enrichment of immune-related processes including innate  
208 immune function and genes with a DM9 repeat (which likely have an antimicrobial function  
209 [42,43]). Genes enriched for these processes reduced in expression following cold treatment,  
210 suggesting that investment in immune function is reduced in colder temperatures. This finding  
211 is in contrast to most previous work which shows that cold exposure stimulates an increase in  
212 immune function (e.g. *Ostrinia furnacalis* [44], *Pyrrharctia isabella* [45], *Megachile rotundata*  
213 [46], and *D. melanogaster* [47–49]). Such increases may represent a shift in investment for  
214 enhanced immune activity during colder periods, however, it is also consistent with a general  
215 stress response, or immune activation due cold-induced tissue damage [50]. Since we  
216 observe a reduction in immune expression, the changes we see in immunity are unlikely to be  
217 as a result of general stress or tissue damage response but instead due to a specific reduced  
218 investment in immunity. The only other study to our knowledge that found a reduction in  
219 immune function due to cold was performed with *Gryllus veletis* [51], which like *D. montana*  
220 has an overwintering diapause stage (though as a nymph rather than an adult). Unlike other  
221 studies that used insects with an overwintering diapause stage (e.g. *Megachile rotundata* [46])  
222 both our and Ferguson et al.'s [51] study also used the developmental stage that will eventually  
223 enter into diapause for experiments. As such the cold treatment used in our and Ferguson et  
224 al.'s [51] study mimics the changing of the seasons and thus may cue these insects into  
225 preparing for the onset of winter. In these cases, reducing resource allocation in immunity is  
226 likely to be beneficial as maintaining immune function is energetically costly [52] and insects  
227 need to conserve energy reserves to survive the winter [53,54]. As such, reducing investment  
228 in immune function may be a common adaptation for insects preparing to overwinter, but future  
229 work in other species will be required to determine if this is a general phenomenon.

230  
231 Processes enriched in genes DE in only one of the sexes are diverse. These processes  
232 represent changes that are potentially more important for one sex than the other, however,  
233 since few genes showed a significant sex by treatment interaction these processes are also  
234 likely to have some role in both sexes. Although diverse, most of the enriched processes are  
235 involved in metabolism, including: biosynthesis of amino acids and proteins, and glutamine  
236 metabolic processes, all of which have been previously associated with increased cold  
237 tolerance in insects [7,55–58]. In addition, we also found an enrichment of processes

238 associated with oxidoreductase activity in females, which may help flies defend against  
239 increased oxidative stress induced by exposure to cold [47].

240

241 In conclusion, we found that male and females respond to the onset of cold in a similar way at  
242 both the phenotypic and transcriptomic levels. Despite this, cold treatment also reduced the  
243 amount of sexually dimorphic gene expression, with males showing a larger reduction than  
244 females, suggesting that preparing for colder periods involves reducing investment in male-  
245 specific functions. Gene expression changes were mainly associated with shifts in metabolic  
246 processes, however, we also observed decreased expression of immune genes suggesting  
247 that reduced investment in immunity may be an important adaptation to help survive the colder  
248 season. Finally, our results suggest that sex-specific adaptations involved in life history  
249 tradeoffs are subtle but potentially important, even when they are not apparent at the  
250 phenotypic level, highlighting the importance of examining tradeoffs at both phenotypic and  
251 molecular levels.



## 252 **Methods**

253

### 254 **Samples**

255

256 A genetically variable population cage was established using twenty fertilized *D. montana*  
257 females collected in 2013 from Korpilahti (62°N), Finland. This population cage was  
258 maintained in constant light at 19 °C to prevent the flies from entering diapause but note that  
259 *D. montana* do not lose circadian clock rhythmicity in constant light in contrast to *D.*  
260 *melanogaster* [59]. Newly enclosed flies from the cage population were anaesthetized with  
261 CO<sub>2</sub> and separated by sex under a microscope and placed into half-pint bottles with yeast-  
262 malt medium. For the next 16 days, the bottles were kept at 19 °C, and flies were transferred  
263 to new bottles every week. After 16 days, half of both females and males were subjected to  
264 the cold treatment, which was 5 days at 6 °C [19] and the rest of the flies served as a control  
265 group remaining at 19 °C. At 21 days, we performed phenotyping and RNA extractions. Note  
266 that different individuals were used for phenotyping and RNA-extractions.

267

### 268 **Phenotypic measurements of cold tolerance**

269

270 The phenotypic effect of cold on cold tolerance was determined by measuring the critical  
271 thermal minimum (CT<sub>min</sub>) of the flies. CT<sub>min</sub> is the temperature at which flies lose  
272 neuromuscular function, causing them to fall into a reversibly immobilized state called chill-  
273 coma (see Andersen et al. [60] for details). 21-day-old flies were put into 10 cm long glass  
274 tubes of diameter 1 cm, with 2-3 flies per tube. Flies in tubes were kept apart by pieces of  
275 plastic foam. The tubes were then sealed with Parafilm and submerged into a 30 % glycol-  
276 water mixture within a Julabo F32-HL refrigerated/heating circulator. Temperature of the liquid  
277 was then decreased at the rate of 0.5 °C/min from 19 °C to -10 °C as to be slow enough to  
278 allow the insect's body temperature to cool with the temperature in the chamber but fast  
279 enough to avoid a substantial physiological response, during the cooling [61].

280

281 CT<sub>min</sub> was recorded as the temperature at which a fly entered a chill-coma state by falling  
282 down. The experiment was done in batches of no more than 8 tubes with a maximum of 24  
283 flies for a total of 137 flies. Flies were cooled to a point at least a couple of degrees Celsius  
284 below the temperature at which the last fly had entered chill-coma. Afterwards, the tubes were  
285 incubated at room temperature until all the flies had recovered from the chill-coma, to make  
286 sure that all the flies were normal, healthy individuals. Finally, the flies were killed by putting  
287 them into a freezer (-20 °C) for at least 12 hours, after which their weight was measured. The  
288 effects of temperature, sex, temperature by sex interaction, and weight on (log-transformed)  
289 critical thermal minimum were then tested using a type-III ANOVA in R (v. 3.5.1) [62]. Note  
290 that a value of five was added to all values of CT<sub>min</sub> before log-transforming data to avoid  
291 taking the log of negative values.

292

### 293 **RNA extraction and sequencing**

294

295 21-day-old flies were collected from the maintenance chambers and flash-frozen in liquid  
296 nitrogen and pooled into 12 samples with three flies in each sample for both cold treated and  
297 control groups. Flies were crushed with a plastic mortar, after which RNA extraction using ZR  
298 Insect & Tissue RNA Micro Kit with DNase treatment (Zymo Research) was carried out. RNA

299 concentration was measured with Qubit (ThermoFisher), purity with NanoDrop ND-1000  
300 (NanoDrop Technologies) and integrity with TapeStation 2200 (Agilent Technologies). Strand-  
301 specific library preparation (one library per sample) and paired-end (150 + 150 bp) Illumina  
302 sequencing (Illumina HiSeq 3000, 5 lanes) was then performed at the Finnish Functional  
303 Genomics Center (FFCG), Turku, Finland.

304

### 305 **Read trimming and mapping**

306

307 Raw reads were trimmed before mapping. Firstly, CutAdapt [63] was used to trim adapter  
308 sequences from the reads before further trimming reads using Trimmomatic v 0.36 [64]. All  
309 reads were trimmed to 140 bp, then quality trimmed with the following options: LEADING:30  
310 TRAILING:30 SLIDINGWINDOW:17:19. Any reads less than 85 bp in length after trimming  
311 were discarded. Quality-trimmed reads from each library were then mapped separately to the  
312 *D. montana* reference genome [65] using STAR (v. 2.4.2a) [66] with default options. Read  
313 counts for each gene were then obtained using HTSeq (v. 0.9.1.) [67].

314

### 315 **Differential gene expression analysis**

316

317 Expression analyses were performed using the Bioconductor package EdgeR (v. 3.24.0) [68]  
318 in R (v. 3.5.1) [62]. Genes with counts per million <0.5 in 2 or more libraries per condition were  
319 excluded. Normalization factors for each library were computed using the TMM method. To  
320 estimate dispersion, we fit a generalized linear model (GLM) with a negative binomial  
321 distribution with the terms sex, temperature and their interaction. A quasi-F test was used to  
322 determine the significance of model terms for each gene by comparing appropriate model  
323 contrasts, with p-values corrected for multiple tests using Benjamini and Hochberg's algorithm  
324 [69]. Statistical significance was set to 5%. Whether genes DE in males and females showed  
325 a greater overlap than expected by chance was determined using the SuperExactTest  
326 package (v. 0.99.4) [70].

327

328 Sex-biased genes were classified as genes showing significant differences (FDR <0.05,  
329  $|\log_2FC| \geq 1$ ) between males and females in both control and cold treated samples. We chose  
330 these thresholds in order to select a robust set of sex-biased genes and to reduce the effect  
331 of sex-biased allometry [71]. Changes in expression of sex-biased genes in response to cold  
332 were then determined using a Wilcoxon test, corrected for multiple tests using Benjamini and  
333 Hochberg's algorithm. We also repeated this analysis when sex-biased genes were defined  
334 with the additional condition that they are also sex-biased in *D. virilis*. Values for sex-biased  
335 expression in *D. virilis* were obtained from the sex-associated gene database [72]  
336 (downloaded 5<sup>th</sup> November 2019). Genes sex-biased in *D. montana* and *D. virilis* showed good  
337 agreement (Fig. S3). To examine the overall similarity of male and female gene expression in  
338 each condition, we compared Spearman's correlation coefficients of male and female gene  
339 expression (as mean  $\log_2$  CPM) in control and cold treated flies using a Fisher's z test  
340 implemented in the cocor package [73] in R [62].

341

### 342 **Functional annotation clustering**

343

344 Functional annotation clustering of DE genes was carried out using DAVID (Database for  
345 Annotation, Visualization, and Integrated Discovery) v. 6.8 [74,75] with *D. melanogaster*  
346 orthologs (obtained from [www.flymine.org](http://www.flymine.org)). When multiple orthologs were obtained one was

347 chosen at random to be used in DAVID. DAVID clusters genes into functional groups using a  
348 “fuzzy” clustering algorithm, and then uses a Fisher’s exact test to identify significantly  
349 enriched functional groups. A functional group was considered to be significantly enriched if  
350 its enrichment score was greater than 1.3 ( $p < 0.05$ ).

351

## 352 **Data accessibility**

353

354 Raw reads have been deposited in SRA under accession codes SRR10960337 -  
355 SRR10960348 (see Supplemental Table 2). Scripts for the analyses in this paper are available  
356 at [https://github.com/DarrenJParker/montana\\_sex-specific\\_responses\\_to\\_cold](https://github.com/DarrenJParker/montana_sex-specific_responses_to_cold) and will be  
357 archived at Zenodo after acceptance. Raw CTmin data is given in Supplemental Table 3. Full  
358 gene expression results are given in Supplemental Table 4.

359

## 360 **Acknowledgements**

361

362 This work was supported by Academy of Finland projects 268214 and 322980 to MK and a  
363 NERC (UK) grant NE/P000592/1 to MGR.

364

## 365 **Author Contributions**

366

367 M.K. and D.J.P. designed the study. M.K. and T.E. collected samples and performed  
368 molecular work. D.J.P. and T.E analysed the data with input from M.G.R and M.K. D.J.P.,  
369 M.G.R and M.K. wrote the manuscript with input from T.E.

370 **Table 1 | The effect of sex, cold treatment, and weight assessed by ANOVA (full**  
371 **model). Significant p-values are in bold.**

| <b>Model Term</b>    | <b>Sum of Sq</b> | <b>Df</b> | <b>F values</b> | <b>P</b>       |
|----------------------|------------------|-----------|-----------------|----------------|
| Sex                  | 0.0038           | 1         | 0.0391          | 0.8436         |
| Cold Treatment       | 1.0815           | 1         | 11.1732         | <b>0.00108</b> |
| Weight               | 0.0838           | 1         | 0.8657          | 0.35386        |
| Sex * Cold Treatment | 0.1345           | 1         | 1.39            | 0.24053        |
| Residuals            | 12.7769          | 132       |                 |                |

372

373

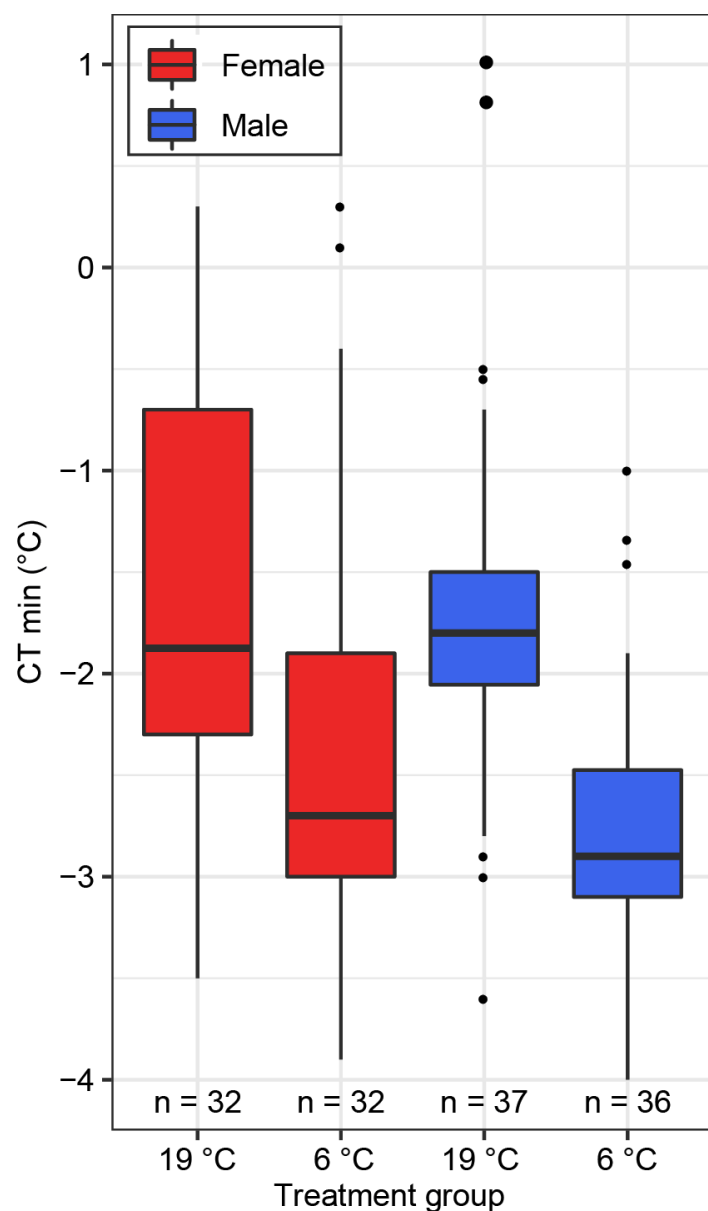

374

375 **Fig. 1** | Cold tolerance is higher for male and females when maintained at a colder  
376 temperature. Treatment group indicates whether flies were maintained at 19 °C or 6 °C for five  
377 days (see text for detailed methods). CTmin is the temperature at which flies lose  
378 neuromuscular function.

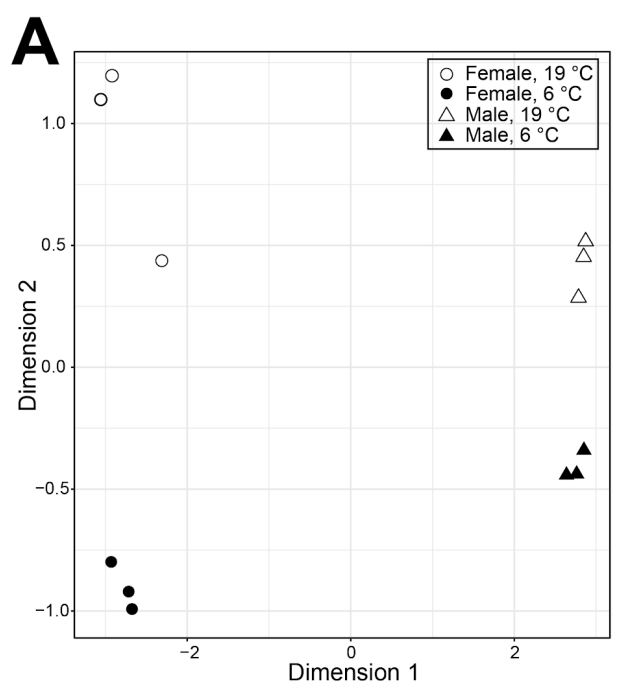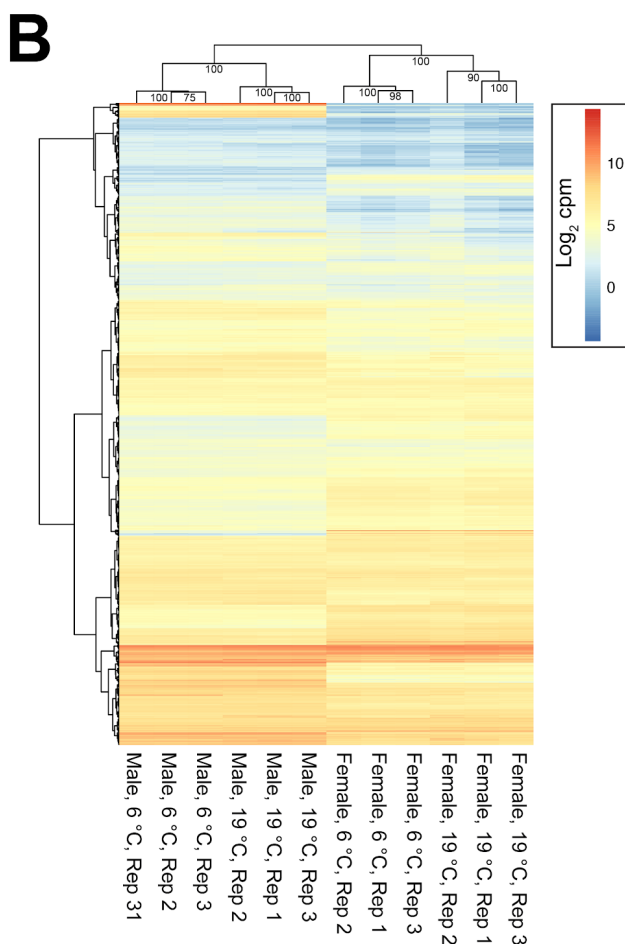

379  
380  
381  
382  
383  
384  
385

**Fig. 2 | A)** MDS plot of male (triangle) and female (circle) expression when kept at 19 °C (empty shapes) or 6 °C for 5 days (filled shapes). Distances between samples in the MDS plot approximate the log<sub>2</sub> fold change of the 500 genes with the largest biological variation between the libraries. **B)** Heatmaps and hierarchical clustering of gene expression (log<sub>2</sub> CPM). Values on each node show the bootstrap support from 1000 replicates.

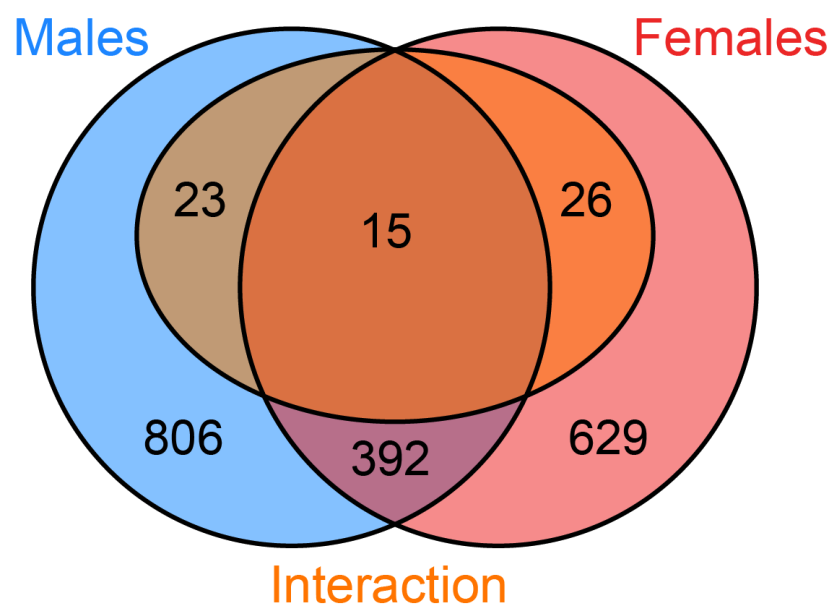

386

387

388 **Fig. 3 |** Venn-diagrams showing the overlap of genes DE in response to cold treatment in  
389 males (blue) and females (red). Genes showing a significant sex by treatment interaction are  
shown in orange.

390

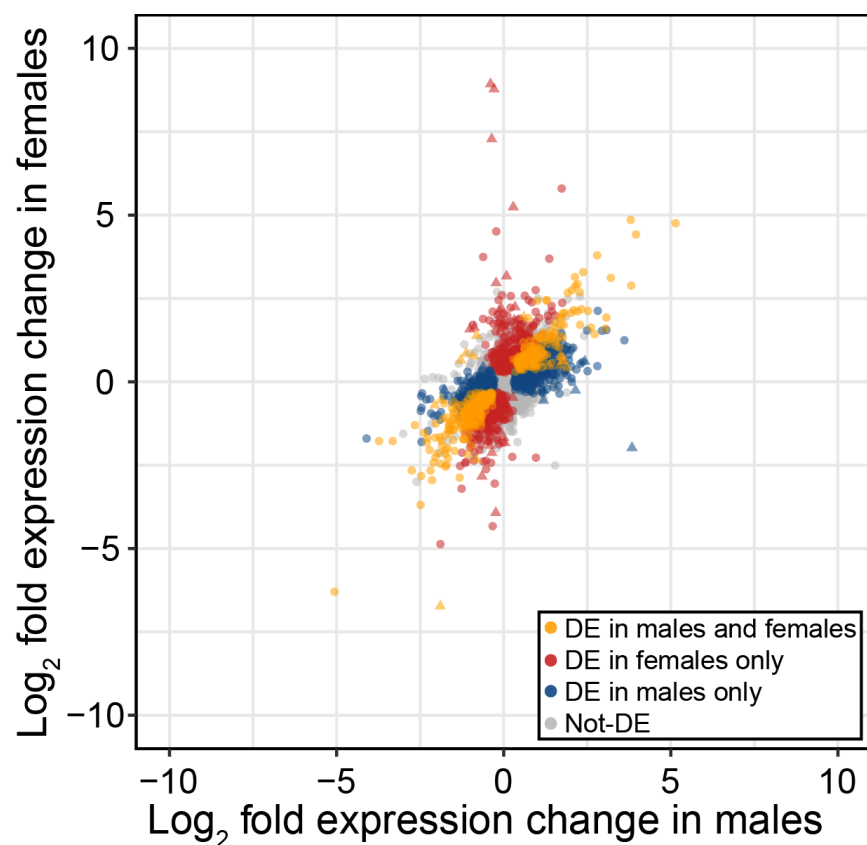

391

392

393

394

**Fig. 4 |** Expression change in males and females in response to cold treatment, indicating genes differentially expressed in males and females (orange), females only (red), males only (blue) and in neither sex (grey). Triangle points indicate a significant sex by treatment effect.



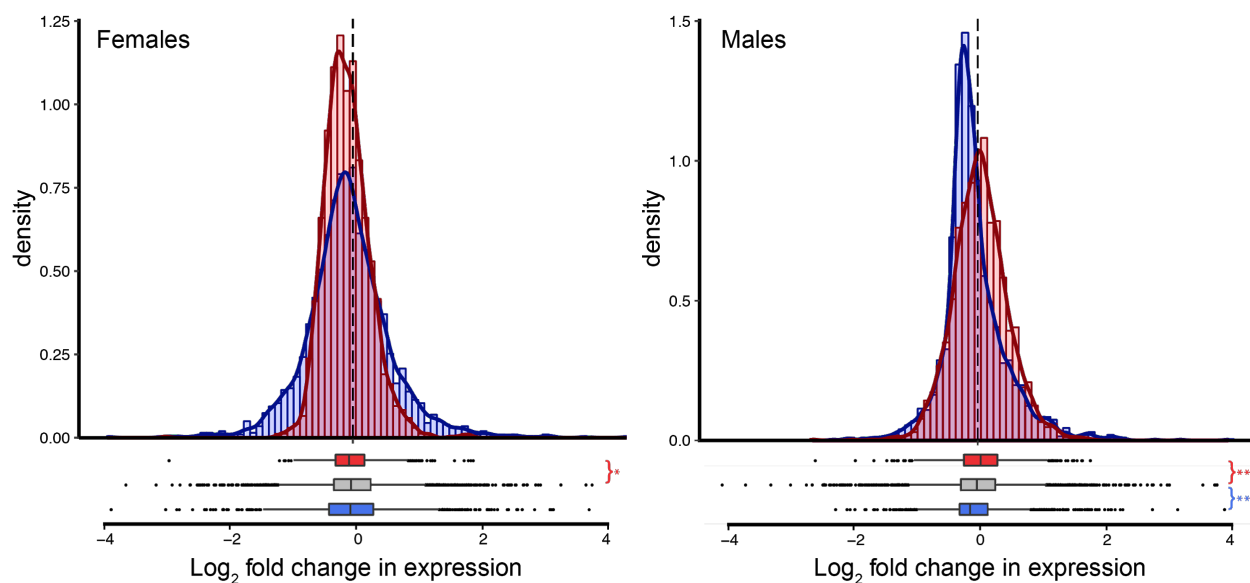

395  
396 **Fig. 5 |** Expression shifts in sex-biased genes following cold treatment in females and males.  
397 Positive values indicate increased expression in cold-treated flies. Asterisks indicate the  
398 significance level (FDR) of Wilcoxon tests comparing the change in expression in female-  
399 biased (red) and male-biased (blue) genes to unbiased genes (\*\*<math><0.001</math>, \*\*<math><0.01</math>, \*<math><0.05</math>).

400  
401

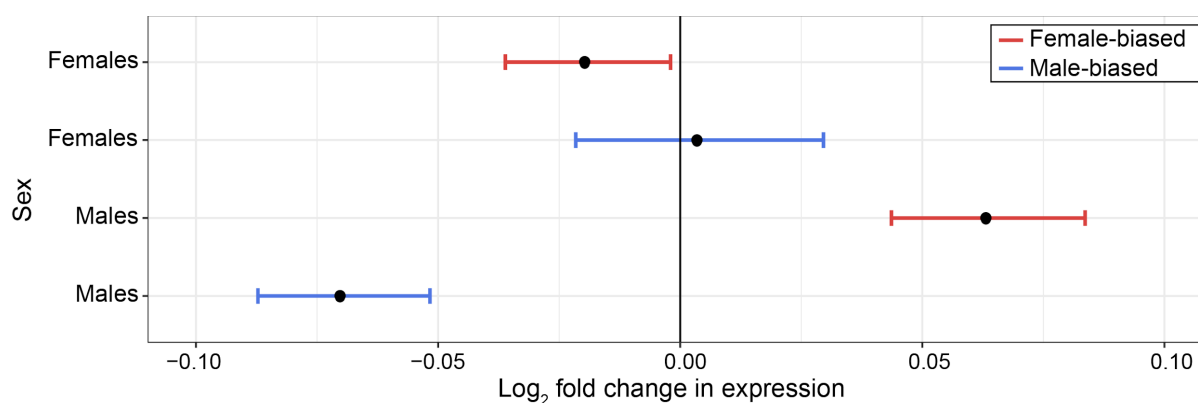

402  
403 **Fig. 6 |** Expression shifts in male- (blue) and female- (red) biased genes following cold  
404 treatment in females and males relative to the median expression of unbiased genes.  
405 Positive values indicate increased expression in cold-treated flies. Points indicate pseudo-  
406 median and error bars indicate the 95% confidence interval.

## 407 References

- 408 1. Stearns SC. 1992 *The evolution of life histories*. Oxford, UK: Oxford University Press.
- 409 2. Stearns SC. 2000 Life history evolution: successes, limitations, and prospects.  
410 *Naturwissenschaften* **87**, 476–486.
- 411 3. Roff DA. 2002 *The evolution of life histories. Theory and analysis*. New York, USA:  
412 Chapman & Hall.
- 413 4. Scheiner SM. 1993 Genetics and evolution of phenotypic plasticity. *Annu. Rev. Ecol.*  
414 *Syst.* **24**, 35–68.
- 415 5. Schlichting CD. 1986 The evolution of phenotypic plasticity in plants. *Annu. Rev. Ecol.*  
416 *Syst.* **17**, 667–693.
- 417 6. Lee RE. 1991 Principles of insect low temperature tolerance. In *Insects at low*  
418 *temperature* (eds RE Lee, DL Denlinger), pp. 17–46. Boston, USA: Springer.
- 419 7. Denlinger DL, Lee RE Jr. 2010 *Low temperature biology of insects*. Cambridge, UK:  
420 Cambridge University Press.
- 421 8. Bublly OA, Riihimaa A, Norry FM, Loeschcke V. 2002 Variation in resistance and  
422 acclimation to low-temperature stress among three geographical strains of *Drosophila*  
423 *melanogaster*. *J. Therm. Biol.* **27**, 337–344.
- 424 9. Bonduriansky R. 2007 The evolution of condition-dependent sexual dimorphism. *Am.*  
425 *Nat.* **169**, 9–19.
- 426 10. Rowe L, Houle D. 1996 The lek paradox and the capture of genetic variance by  
427 condition dependent traits. *Proceedings of the Royal Society of London. Series B:*  
428 *Biological Sciences* **263**, 1415–1421.
- 429 11. Andersson M. 1982 Sexual selection, natural selection and quality advertisement. *Biol.*  
430 *J. Linn. Soc. Lond.* **17**, 375–393.
- 431 12. Cotton S, Fowler K, Pomiankowski A. 2004 Do sexual ornaments demonstrate  
432 heightened condition-dependent expression as predicted by the handicap hypothesis?  
433 *Proc. Biol. Sci.* **271**, 771–783.
- 434 13. Kokko H. 2001 Fisherian and ‘good genes’ benefits of mate choice: how (not) to  
435 distinguish between them. *Ecol. Lett.* **4**, 322–326.
- 436 14. Trivers R. 1972 Parental investment and sexual selection. In *Sexual Selection and the*  
437 *Descent of Man* (ed BB Campbell), pp. 136–179. Chicago, USA: Aldine.
- 438 15. Mank JE. 2017 The transcriptional architecture of phenotypic dimorphism. *Nature*  
439 *Ecology & Evolution* **1**, 0006.
- 440 16. Grath S, Parsch J. 2016 Sex-Biased Gene Expression. *Annu. Rev. Genet.* **50**, 29–44.
- 441 17. Innocenti P, Morrow EH. 2010 The sexually antagonistic genes of *Drosophila*  
442 *melanogaster*. *PLoS Biol.* **8**, e1000335.
- 443 18. Kellermann V, Overgaard J, Hoffmann AA, Fløjgaard C, Svenning J-C, Loeschcke V.  
444 2012 Upper thermal limits of *Drosophila* are linked to species distributions and strongly  
445 constrained phylogenetically. *Proc. Natl. Acad. Sci. U. S. A.* **109**, 16228–16233.

- 446 19. Vesala L, Salminen TS, Laiho A, Hoikkala A, Kankare M. 2012 Cold tolerance and cold-  
447 induced modulation of gene expression in two *Drosophila virilis* group species with  
448 different distributions. *Insect Mol. Biol.* **21**, 107–118.
- 449 20. Flatt T, Heyland A, editors. 2011 *Mechanisms of life history evolution: The genetics and*  
450 *physiology of life history traits and trade-offs*. Oxford, UK: Oxford University Press.
- 451 21. Kellermann V, Loeschcke V, Hoffmann AA, Kristensen TN, Fløjgaard C, David JR,  
452 Svenning JC, Overgaard J. 2012 Phylogenetic constraints in key functional traits behind  
453 species' climate niches: patterns of desiccation and cold resistance across 95  
454 *Drosophila* species. *Evolution* **66**, 3377–3389.
- 455 22. Watabe HA. 1983 Photoperiodic responses in the *Drosophila virilis* species group  
456 (Diptera, Drosophilidae) from Japan. *Kontyu* **51**, 628–634.
- 457 23. Camus MF, Piper MD, Reuter M. 2019 Sex-specific transcriptomic responses to  
458 changes in the nutritional environment. *Elife* **8**, e47262.
- 459 24. Wyman MJ, Agrawal AF, Rowe L. 2010 Condition-dependence of the sexually  
460 dimorphic transcriptome in *Drosophila melanogaster*. *Evolution* **64**, 1836–1848.
- 461 25. Kijimoto T, Snell-Rood EC, Pespeni MH, Rocha G, Kafadar K, Moczek AP. 2014 The  
462 nutritionally responsive transcriptome of the polyphenic beetle *Onthophagus taurus* and  
463 the importance of sexual dimorphism and body region. *Proc. Biol. Sci.* **281**, 20142084.
- 464 26. Ledón-Rettig CC, Moczek AP. 2016 The transcriptomic basis of tissue- and nutrition-  
465 dependent sexual dimorphism in the beetle *Onthophagus taurus*. *Ecol. Evol.* **6**, 1601–  
466 1613.
- 467 27. Zinna R, Emlen D, Lavine LC, Johns A, Gotoh H, Niimi T, Dworkin I. 2018 Sexual  
468 dimorphism and heightened conditional expression in a sexually selected weapon in the  
469 Asian rhinoceros beetle. *Mol. Ecol.* **27**, 5049–5072.
- 470 28. Malacrinò Antonino, Kimber Christopher M., Brengdahl Martin, Friberg Urban. 2019  
471 Heightened condition-dependence of the sexual transcriptome as a function of genetic  
472 quality in *Drosophila melanogaster* head tissue. *Proceedings of the Royal Society B:*  
473 *Biological Sciences* **286**, 20190819.
- 474 29. Overgaard J, MacMillan HA. 2017 The integrative physiology of insect chill tolerance.  
475 *Annu. Rev. Physiol.* **79**, 187–208.
- 476 30. Parker DJ, Vesala L, Ritchie MG, Laiho A, Hoikkala A, Kankare M. 2015 How consistent  
477 are the transcriptome changes associated with cold acclimation in two species of the  
478 *Drosophila virilis* group? *Heredity* **115**, 13–21.
- 479 31. Kivivuori L, Lehti S, Lagerspetz KYH. 1990 Effect of temperature acclimation on thermal  
480 dependence and hysteresis of the resting membrane potential of the stretch receptor  
481 neurone in crayfish *Astacus astacus* (L.). *J. Therm. Biol.* **15**, 9–14.
- 482 32. Heitler WJ, Goodman CS, Rowell CHF. 1977 The effects of temperature on the  
483 threshold of identified neurons in the locust. *J. Comp. Physiol.* **117**, 163–182.
- 484 33. Hochachka PW. 1986 Defense strategies against hypoxia and hypothermia. *Science*  
485 **231**, 234–241.
- 486 34. Košťál V, Vambera J, Bastl J. 2004 On the nature of pre-freeze mortality in insects:  
487 water balance, ion homeostasis and energy charge in the adults of *Pyrhocoris apterus*.

- 488 *J. Exp. Biol.* **207**, 1509–1521.
- 489 35. Overgaard J, Tomcala A, Sørensen JG, Holmstrup M, Krogh PH, Simek P, Kostál V.  
490 2008 Effects of acclimation temperature on thermal tolerance and membrane  
491 phospholipid composition in the fruit fly *Drosophila melanogaster*. *J. Insect Physiol.* **54**,  
492 619–629.
- 493 36. Andersen MK, Overgaard J. 2019 The central nervous system and muscular system  
494 play different roles for chill coma onset and recovery in insects. *Comp. Biochem.*  
495 *Physiol. A Mol. Integr. Physiol.* (doi:10.1016/j.cbpa.2019.03.015)
- 496 37. Hazel JR. 1995 Thermal adaptation in biological membranes: is homeoviscous  
497 adaptation the explanation? *Annu. Rev. Physiol.* **57**, 19–42.
- 498 38. Košťál V, Berková P, Šimek P. 2003 Remodelling of membrane phospholipids during  
499 transition to diapause and cold-acclimation in the larvae of *Chymomyza costata*  
500 (*Drosophilidae*). *Comp. Biochem. Physiol. B Biochem. Mol. Biol.* **135**, 407–419.
- 501 39. Michaud MR, Denlinger DL. 2006 Oleic acid is elevated in cell membranes during rapid  
502 cold-hardening and pupal diapause in the flesh fly, *Sarcophaga crassipalpis*. *J. Insect*  
503 *Physiol.* **52**, 1073–1082.
- 504 40. Kayukawa T, Chen B, Hoshizaki S, Ishikawa Y. 2007 Upregulation of a desaturase is  
505 associated with the enhancement of cold hardiness in the onion maggot, *Delia antiqua*.  
506 *Insect Biochem. Mol. Biol.* **37**, 1160–1167.
- 507 41. Vigoder FM, Parker DJ, Cook N, Tournière O, Sneddon T, Ritchie MG. 2016 Inducing  
508 cold-sensitivity in the frigidophilic fly *Drosophila montana* by RNAi. *PLoS One* **11**,  
509 e0165724.
- 510 42. Jiang S *et al.* 2017 DM9 domain containing protein functions as a pattern recognition  
511 receptor with broad microbial recognition spectrum. *Front. Immunol.* **8**, 1607.
- 512 43. Liu Y *et al.* 2018 A DM9-containing protein from oyster *Crassostrea gigas* (CgDM9CP-2)  
513 serves as a multipotent pattern recognition receptor. *Dev. Comp. Immunol.* **84**, 315–  
514 326.
- 515 44. Chen K *et al.* 2019 The immune and stress responses are required for *Ostrinia*  
516 *fumacalis* to defend against temperature stress. *Front. Physiol.* **10**, 1289.
- 517 45. Marshall KE, Sinclair BJ. 2011 The sub-lethal effects of repeated freezing in the woolly  
518 bear caterpillar *Pyrrharctia isabella*. *J. Exp. Biol.* **214**, 1205–1212.
- 519 46. Xu J, James RR. 2012 Temperature stress affects the expression of immune response  
520 genes in the alfalfa leafcutting bee, *Megachile rotundata*. *Insect Mol. Biol.* **21**, 269–280.
- 521 47. MacMillan HA, Knee JM, Dennis AB, Udaka H, Marshall KE, Merritt TJS, Sinclair BJ.  
522 2016 Cold acclimation wholly reorganizes the *Drosophila melanogaster* transcriptome  
523 and metabolome. *Sci. Rep.* **6**, 28999.
- 524 48. Le Bourg E, Massou I, Gobert V. 2009 Cold stress increases resistance to fungal  
525 infection throughout life in *Drosophila melanogaster*. *Biogerontology* **10**, 613–625.
- 526 49. Zhang J, Marshall KE, Westwood JT, Clark MS, Sinclair BJ. 2011 Divergent  
527 transcriptomic responses to repeated and single cold exposures in *Drosophila*  
528 *melanogaster*. *J. Exp. Biol.* **214**, 4021–4029.

- 529 50. MacMillan HA, Sinclair BJ. 2011 The role of the gut in insect chilling injury: cold-induced  
530 disruption of osmoregulation in the fall field cricket, *Gryllus pennsylvanicus*. *J. Exp. Biol.*  
531 **214**, 726–734.
- 532 51. Ferguson LV, Heinrichs DE, Sinclair BJ. 2016 Paradoxical acclimation responses in the  
533 thermal performance of insect immunity. *Oecologia* **181**, 77–85.
- 534 52. Ardia DR, Gantz JE, Brent C., Schneider, Strebel S. 2012 Costs of immunity in insects:  
535 an induced immune response increases metabolic rate and decreases antimicrobial  
536 activity: Energetic costs of immunity. *Funct. Ecol.* **26**, 732–739.
- 537 53. Sinclair BJ. 2015 Linking energetics and overwintering in temperate insects. *J. Therm.*  
538 *Biol.* **54**, 5–11.
- 539 54. Williams CM, Henry HAL, Sinclair BJ. 2015 Cold truths: how winter drives responses of  
540 terrestrial organisms to climate change. *Biol. Rev. Camb. Philos. Soc.* **90**, 214–235.
- 541 55. Storey KB, Storey JM. 2012 Insect cold hardiness: metabolic, gene, and protein  
542 adaptation. *Can. J. Zool.* **90**, 456–475.
- 543 56. Clark MS, Worland MR. 2008 How insects survive the cold: molecular mechanisms—a  
544 review. *J. Comp. Physiol. B* **178**, 917–933.
- 545 57. Teets NM, Denlinger DL. 2013 Physiological mechanisms of seasonal and rapid cold-  
546 hardening in insects. *Physiol. Entomol.* **38**, 105–116.
- 547 58. Doucet D, Walker VK, Qin W. 2009 The bugs that came in from the cold: molecular  
548 adaptations to low temperatures in insects. *Cell. Mol. Life Sci.* **66**, 1404–1418.
- 549 59. Kauranen H, Menegazzi P, Costa R, Helfrich-Förster C, Kankainen A, Hoikkala A. 2012  
550 Flies in the north: locomotor behavior and clock neuron organization of *Drosophila*  
551 *montana*. *J. Biol. Rhythms* **27**, 377–387.
- 552 60. Andersen JL, Manenti T, Sørensen JG, MacMillan HA, Loeschcke V, Overgaard J. 2015  
553 How to assess *Drosophila* cold tolerance: chill coma temperature and lower lethal  
554 temperature are the best predictors of cold distribution limits. *Funct. Ecol.* **29**, 55–65.
- 555 61. Sinclair BJ, Coello Alvarado LE, Ferguson LV. 2015 An invitation to measure insect cold  
556 tolerance: Methods, approaches, and workflow. *J. Therm. Biol.* **53**, 180–197.
- 557 62. R Core Team. 2017 R: A Language and Environment for Statistical Computing.
- 558 63. Martin M. 2011 Cutadapt removes adapter sequences from high-throughput sequencing  
559 reads. *EMBnet J* **17**, 10–12.
- 560 64. Bolger AM, Lohse M, Usadel B. 2014 Trimmomatic: a flexible trimmer for Illumina  
561 sequence data. *Bioinformatics* **30**, 2114–2120.
- 562 65. Parker DJ, Wiberg RAW, Trivedi U, Tyukmaeva VI, Gharbi K, Butlin RK, Hoikkala A,  
563 Kankare M, Ritchie MG. 2018 Inter and intraspecific genomic divergence in *Drosophila*  
564 *montana* shows evidence for cold adaptation. *Genome Biol. Evol.* **10**, 2086–2101.
- 565 66. Dobin A, Davis CA, Schlesinger F, Drenkow J, Zaleski C, Jha S, Batut P, Chaisson M,  
566 Gingeras TR. 2013 STAR: ultrafast universal RNA-seq aligner. *Bioinformatics* **29**, 15–  
567 21.
- 568 67. Anders S, Pyl PT, Huber W. 2015 HTSeq—a Python framework to work with high-

- 569 throughput sequencing data. *Bioinformatics* **31**, 166–169.
- 570 68. Robinson MD, McCarthy DJ, Smyth GK. 2010 edgeR: a Bioconductor package for  
571 differential expression analysis of digital gene expression data. *Bioinformatics* **26**, 139–  
572 140.
- 573 69. Benjamini Y, Hochberg Y. 1995 Controlling the false discovery rate: A practical and  
574 powerful approach to multiple testing. *J. R. Stat. Soc. Series B Stat. Methodol.* **57**, 289–  
575 300.
- 576 70. Wang M, Zhao Y, Zhang B. 2015 Efficient test and visualization of multi-set  
577 intersections. *Sci. Rep.* **5**, 16923.
- 578 71. Montgomery SH, Mank JE. 2016 Inferring regulatory change from gene expression: the  
579 confounding effects of tissue scaling. *Mol. Ecol.* **25**, 5114–5128.
- 580 72. Shi M-W, Zhang N-A, Shi C-P, Liu C-J, Luo Z-H, Wang D-Y, Guo A-Y, Chen Z-X. 2019  
581 SAGD: a comprehensive sex-associated gene database from transcriptomes. *Nucleic  
582 Acids Res.* **47**, D835–D840.
- 583 73. Diedenhofen B, Musch J. 2015 cocor: a comprehensive solution for the statistical  
584 comparison of correlations. *PLoS One* **10**, e0121945.
- 585 74. Huang DW, Sherman BT, Lempicki RA. 2009 Bioinformatics enrichment tools: paths  
586 toward the comprehensive functional analysis of large gene lists. *Nucleic Acids Res.* **37**,  
587 1–13.
- 588 75. Huang DW, Sherman BT, Lempicki RA. 2009 Systematic and integrative analysis of  
589 large gene lists using DAVID bioinformatics resources. *Nat. Protoc.* **4**, 44–57.
